# Supplementary material for: Construction of a 0D/1D composite based on Au nanoparticles/CuBi2O4 microrods for efficient visible-light-driven photocatalytic activity
Source: publisher site journal article supplement (doi:10.3762/bjnano.10.134), 2019-07-04
Supplement: Additional file 1 [file 2190-4286-10-134-S1.pdf]

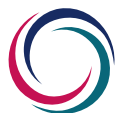

## Supporting Information

for

### **Construction of a 0D/1D composite based on Au nanoparticles/CuBi<sub>2</sub>O<sub>4</sub> microrods for efficient visible-light-driven photocatalytic activity**

Weilong Shi, Mingyang Li, Hongji Ren, Feng Guo, Xiliu Huang, Yu Shi and Yubin Tang

*Beilstein J. Nanotechnol.* **2019**, *10*, 1360–1367. [doi:10.3762/bjnano.10.134](https://doi.org/10.3762/bjnano.10.134)

## Additional experimental data

# Experimental

## Characterization

X-ray diffraction (XRD) patterns were recorded using an X'Pert-ProMPD (Holand) D/max- $\gamma$ A X-ray diffractometer with Cu K $\alpha$  radiation ( $\lambda = 0.154178$  nm). Scanning electron microscopy (SEM) images were taken on a FEI-quanta 200 with an accelerating voltage of 20 kV. Transmission electron microscopy (TEM), high-resolution TEM (HRTEM) and high-angle annular dark-field scanning transmission electron microscopy (HAADF-SEM) were performed with a FEI-Tecnai F20 microscope operating at 200 kV. X-ray photoelectron spectroscopy (XPS) was carried out on a KRATOS Axis ultra-DLD X-ray photoelectron spectrometer with a monochromatized Al K $\alpha$  X-ray source. UV-vis absorption spectra of the samples were recorded on a Lambda 750 (Perking Elmer) spectrophotometer in a range of 200 to 800 nm. The photocurrent-time ( $i-t$ ) curves were recorded on a CHI 920C workstation (CH Instruments, Chenhua, Shanghai, China) using a standard three-electrode cell with a platinum wire as reference electrode and a saturated calomel electrode (SCE) as counter electrode. The  $i-t$  curves were measured at open-circuit potential in 0.5 M Na<sub>2</sub>SO<sub>4</sub> electrolyte and a 300 W Xe lamp with UV-cutoff filter ( $\lambda > 420$  nm) was used as the visible-light source. Electrochemical impedance spectroscopy (EIS) was carried out by using an alternating voltage of 5 mV amplitude in the frequency range from 10<sup>5</sup> Hz to 10<sup>-2</sup> Hz.

## **Photocatalytic degradation of tetracycline**

Briefly, 50 mg photocatalyst was suspended in 100 mL aqueous solution of 10 mg/L tetracycline (TC). The solution was stirred for 30 min in dark to ensure the establishment of adsorption equilibrium. Visible light (300 W, xenon lamp) was obtained by using cutoff filters to remove light of  $\lambda < 420$  nm. At certain time intervals, 3 mL aliquots were extracted and centrifuged in the reaction process, then analyzed in the UV-vis spectrophotometer at a wavelength of 357 nm. For reproducibility and stability tests of the photocatalysts, the suspension was centrifuged after reaction and reused for repeated tests. The photocatalyst was collected and dried in a vacuum oven at 60 °C after each cycle of usage.

## **Capturing of active species**

For the capturing tests, 2-propanol (IPA), disodium ethylenediamine tetraacetic acid (EDTA), and nitrogen ( $N_2$ ) were used as scavengers to detect hydroxyl radicals ( $\bullet OH$ ), electron holes ( $h^+$ ) and superoxide radicals ( $\bullet O_2^-$ ), respectively. The above scavengers were added during the photocatalytic degradation of TC.

## Additional Figures

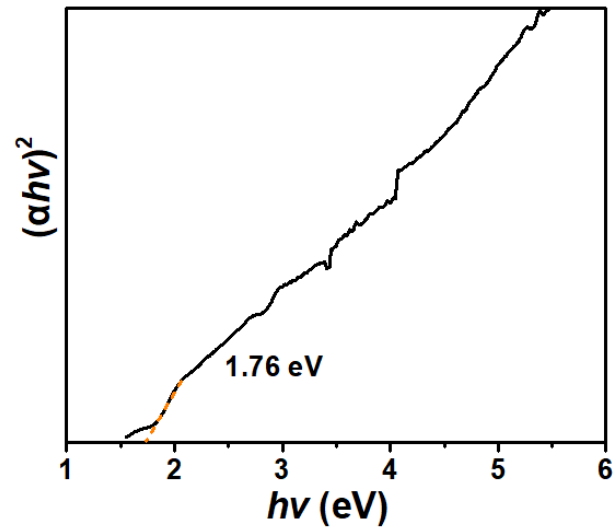

**Figure S1:** Plots of  $(\alpha hv)^2$  as a function of  $hv$  yielding the bandgap energy of pristine CBO.

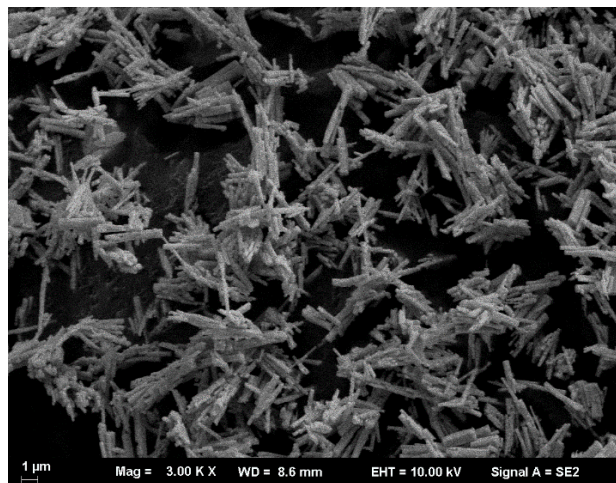

**Figure S2:** SEM image of pristine CBO.

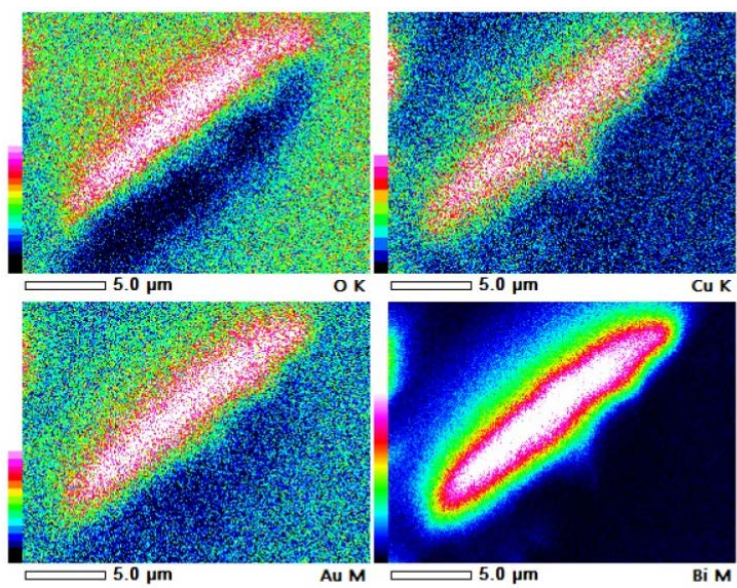

**Figure S3:** EDX–SEM maps of the 2.5 wt % Au/CBO composite.
